# Supplementary material
Source: PubMed Central journal article supplement (PMC3266793)

**Supplemental Figure 1:** CT (left panels) and PET/CT fusion images (right panels) of  $^{11}\text{C}$  tissue activity in the neck and upper chest area 80 seconds after IV injection of  $^{11}\text{C}$ -acetate from dynamic list-mode acquisitions at room temperature (upper row) and during cold exposure (lower row) in one of the participants. The circle in all frames shows the supraclavicular BAT, illustrating the increase in  $^{11}\text{C}$ -acetate activity in BAT during cold exposure vs. at room temperature. Arrows indicate carotid arteries.

**Supplemental Figure 2:** Correlation between BAT volume of activity and shivering during cold exposure expressed as % maximal voluntary muscle contraction.

**Supplemental Table:**

**Spearman correlation between brown adipose tissue volume of activity and metabolic parameters**

|                                         | <i>r</i> | <i>P</i> |
|-----------------------------------------|----------|----------|
| BAT $K_m$ FDG (nmol/ml/min)             | 0.66     | 0.18     |
| BAT $K_m$ FTHA (nmol/ml/min)            | 0.37     | 0.50     |
| $\Delta Ra_{NEFA}$ ( $\mu$ mol/min)     | 0.50     | 0.45     |
| $\Delta TEE$ (kcal/min)                 | 0.20     | 0.71     |
| Muscle shivering (% MVC)                | -0.89    | 0.03     |
| $\Delta BAT$ $^{11}C$ -acetate <i>K</i> | -0.66    | 0.18     |

BAT: brown adipose tissue;  $\Delta$ : change between cold exposure vs. room temperature;  $K_m$  FDG: glucose uptake;  $K_m$  FTHA: nonesterified fatty acid uptake; MVC: maximal voluntary contraction;  $Ra_{NEFA}$ : nonesterified fatty acid rate of appearance in plasma; TEE: total energy expenditure.

# Room Temperature

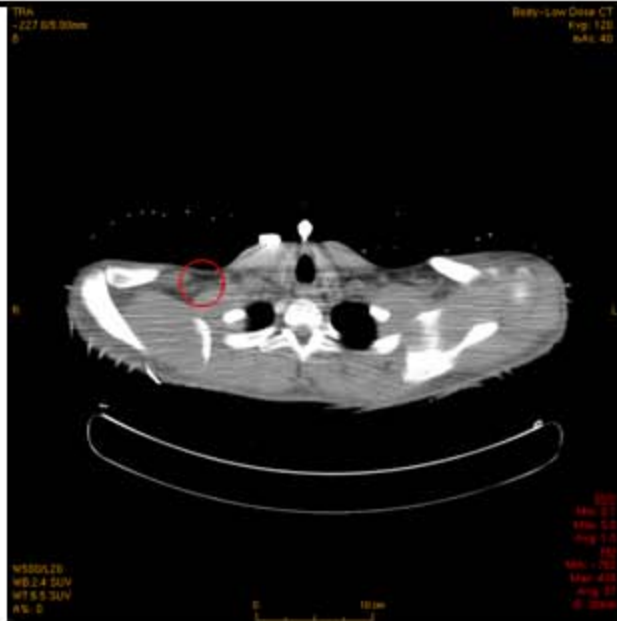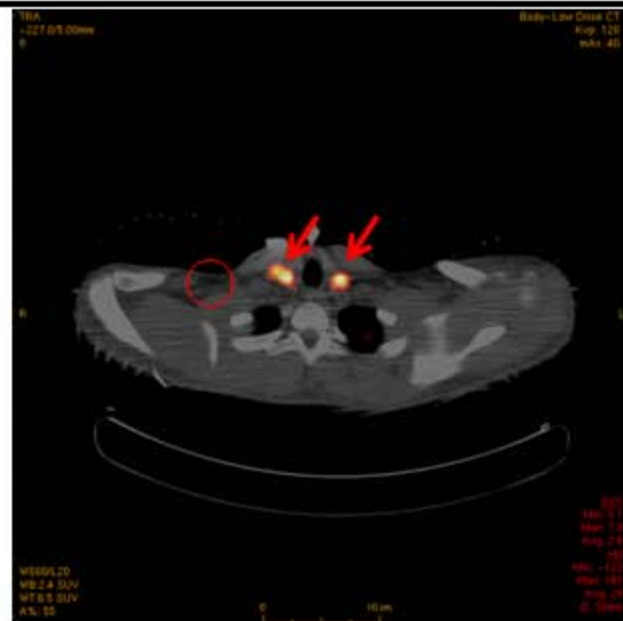

# Cold Exposure

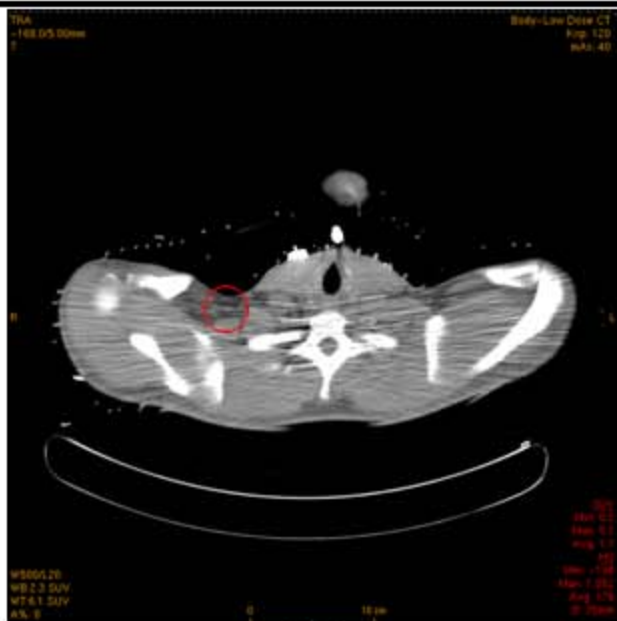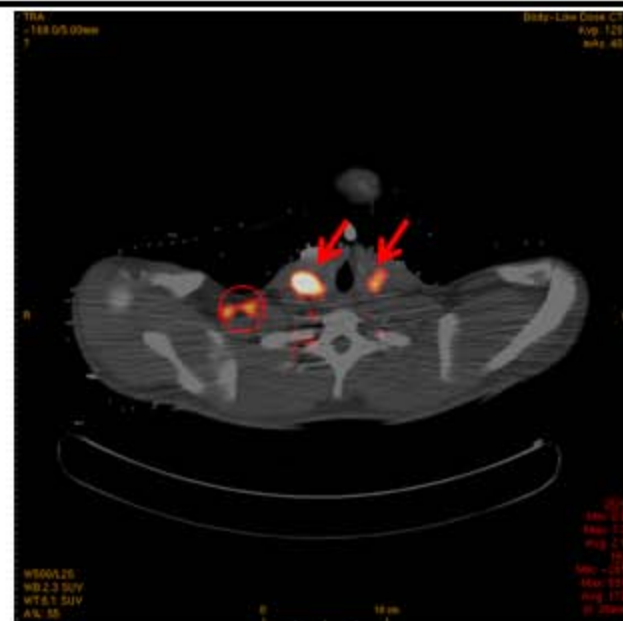

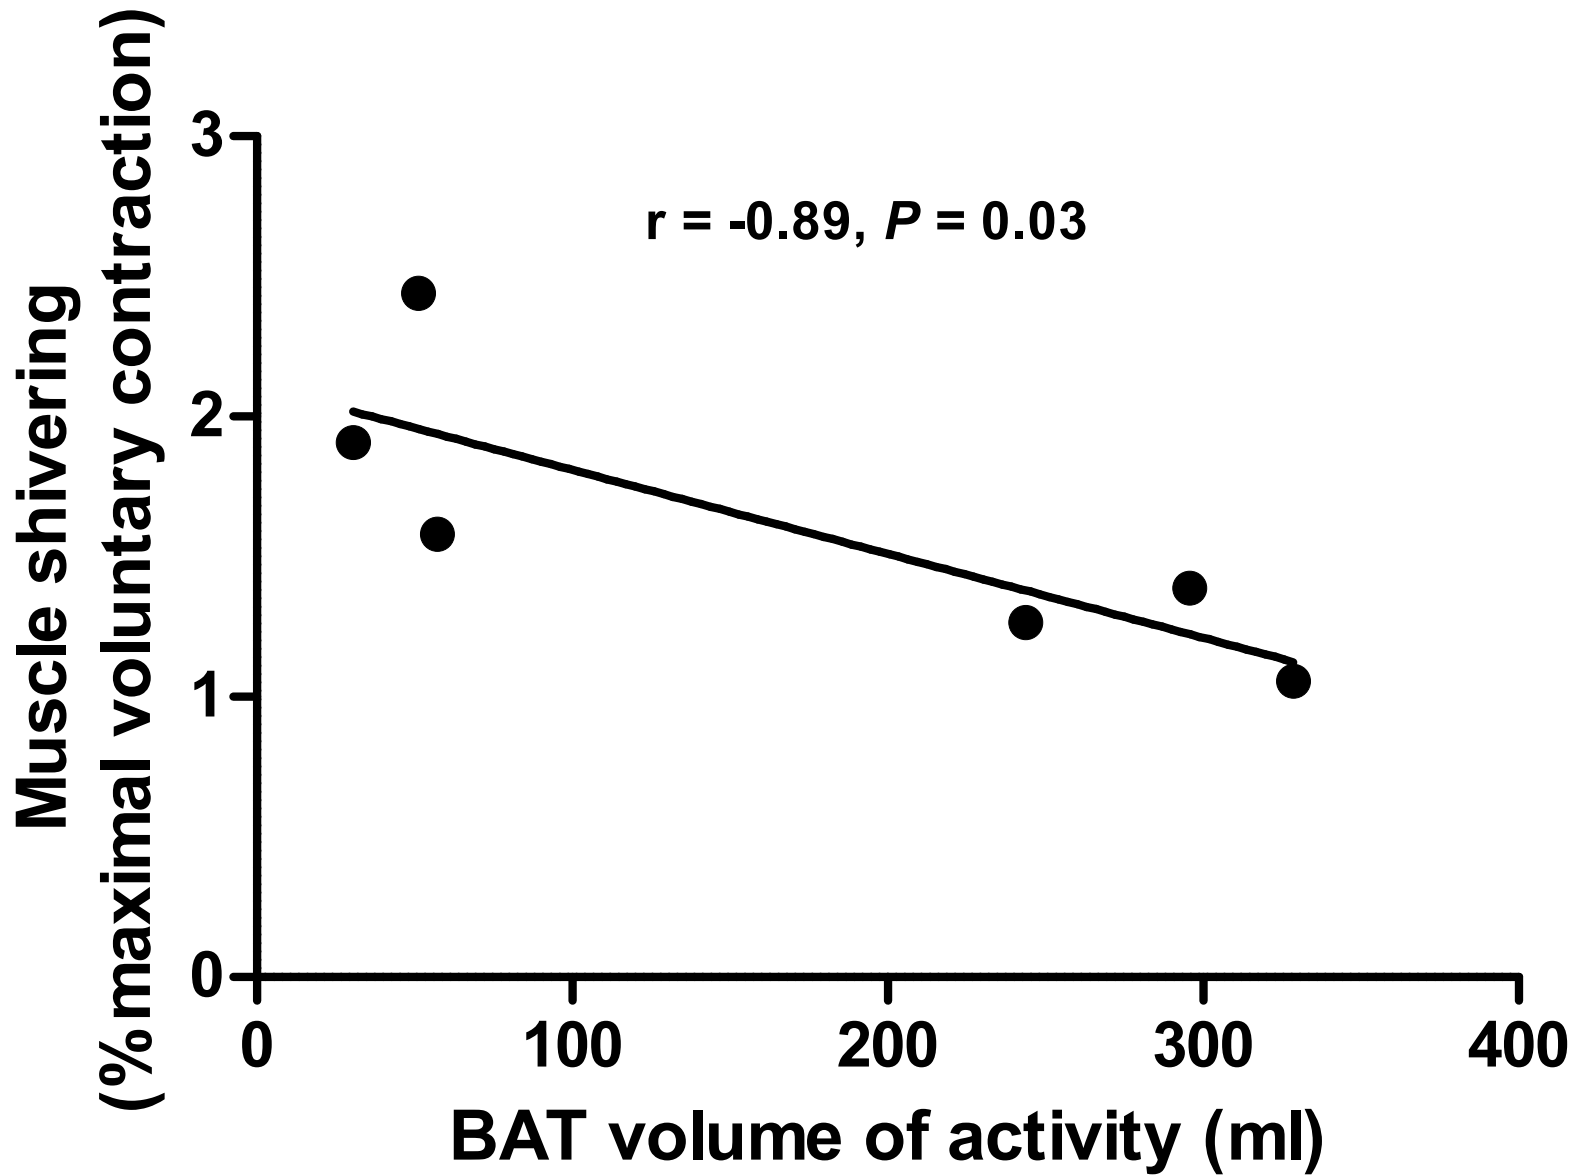

Supplement: JCI60433sd.pdf [file JCI60433sd.pdf]
